# Supplementary material for: Preparation of high-surface-area Ni/α-Al2O3 catalysts for improved CO methanation
Source: Royal Society of Chemistry journal article supplement (doi:10.1039/c4ra13634a), 2014-12-19
Supplement: c4ra13634a1.pdf [file c4ra13634a1.pdf]

## Supporting information

### Preparation of high-surface-area Ni/ $\alpha$ -Al<sub>2</sub>O<sub>3</sub> catalysts for improved CO methanation

Youjun Liu,<sup>a,b</sup> Jiajian Gao,<sup>b</sup> Qing Liu,<sup>b</sup> Fangna Gu,<sup>b,\*</sup> Xiaopeng Lu,<sup>a,b</sup>

Lihua Jia,<sup>a,\*</sup> Guangwen Xu,<sup>b</sup> Ziyi Zhong,<sup>c</sup> and Fabing Su<sup>b,\*</sup>

<sup>a</sup> *College of Chemistry and Chemical Engineering, Qiqihaer University, Qiqihaer161006, Heilongjiang Province, China*

<sup>b</sup> *State Key Laboratory of Multiphase Complex Systems, Institute of Process Engineering, Chinese Academy of Sciences, Beijing 100190, China*

<sup>c</sup> *Institute of Chemical Engineering and Sciences, A\*star, 1 Pesek Road, Jurong Island, 627833, Singapore*

\*Corresponding author: fngu@ipe.ac.cn (F. Gu), jlh29@163.com (L. Jia), fbsu@ipe.ac.cn (F. Su),

Tel.: +86-10-82544850,

Fax: +86-10-82544851

**Table S1** Physical and chemical properties of the catalyst.

| Catalyst | $S_{\text{BET}}^{\text{a}}$<br>( $\text{m}^2 \cdot \text{g}^{-1}$ ) | Ni particle size (nm) |        |
|----------|---------------------------------------------------------------------|-----------------------|--------|
|          |                                                                     | by XRD <sup>b</sup>   | by TEM |
| Ni/CAH-C | 65                                                                  | 20                    | 80–110 |

<sup>a</sup> surface area, derived from BET equation;

<sup>b</sup> crystal size of Ni, derived from XRD by Debye–Scherrer equation;

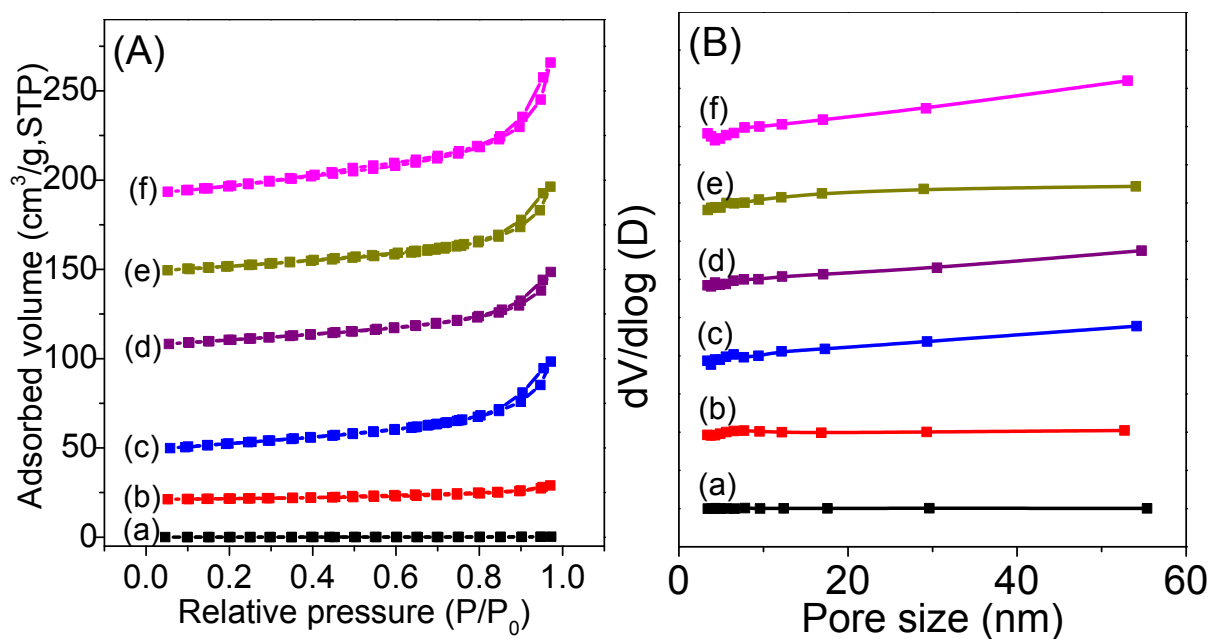

**Fig. S1** N<sub>2</sub> adsorption-desorption isotherms (A) and pore-distribution curves (B) of the samples: (a) A, (b) Ni/A-I, (c) AH, (d) Ni/AH-I, (e) Ni/AH-C, and (f) Ni/CAH-C. (For clarity, the isotherms of Ni/A-I, AH, Ni/AH-I, Ni/AH-C and Ni/CAH-C were vertically shifted curve by 20, 40, 100, 140, 180, respectively).

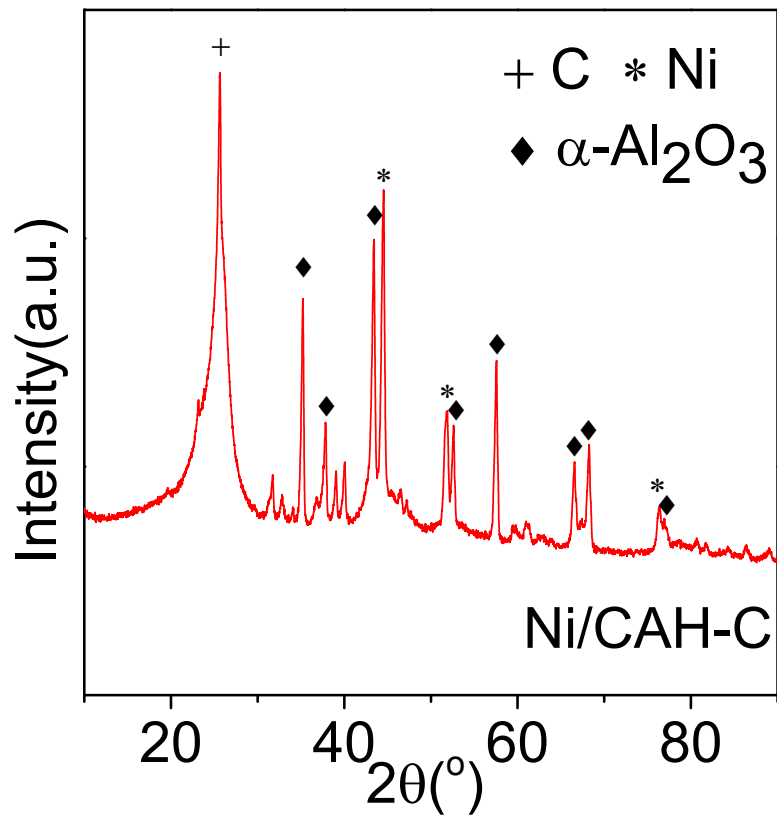

**Fig. S2** The XRD pattern of the Ni/CAH-C

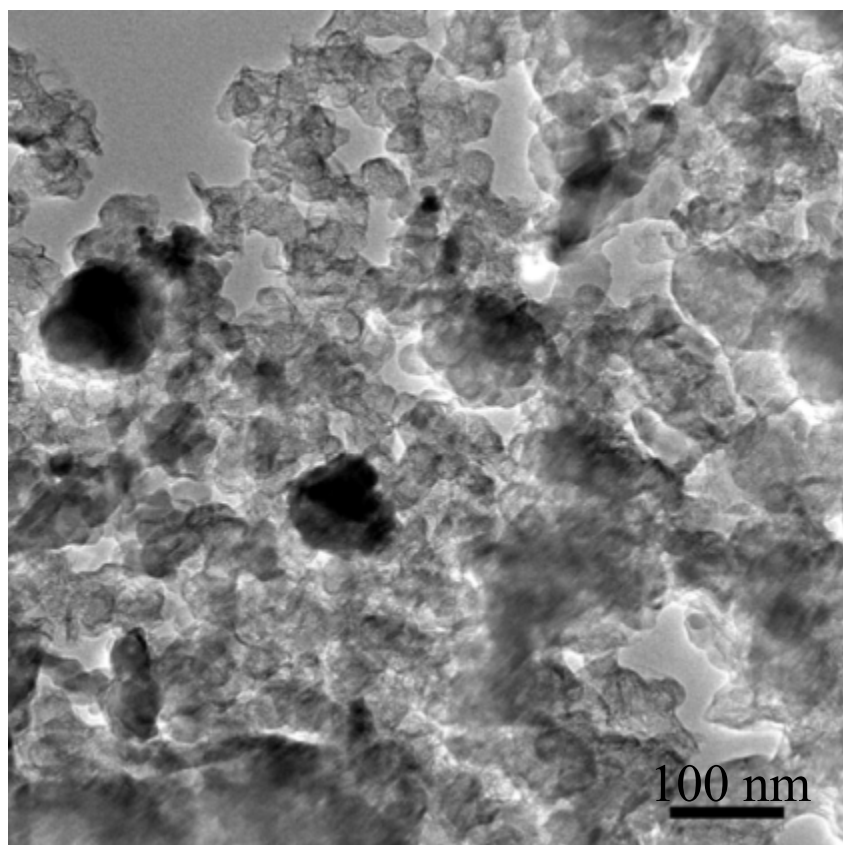

**Fig. S3** TEM image of the Ni/CAH-C.

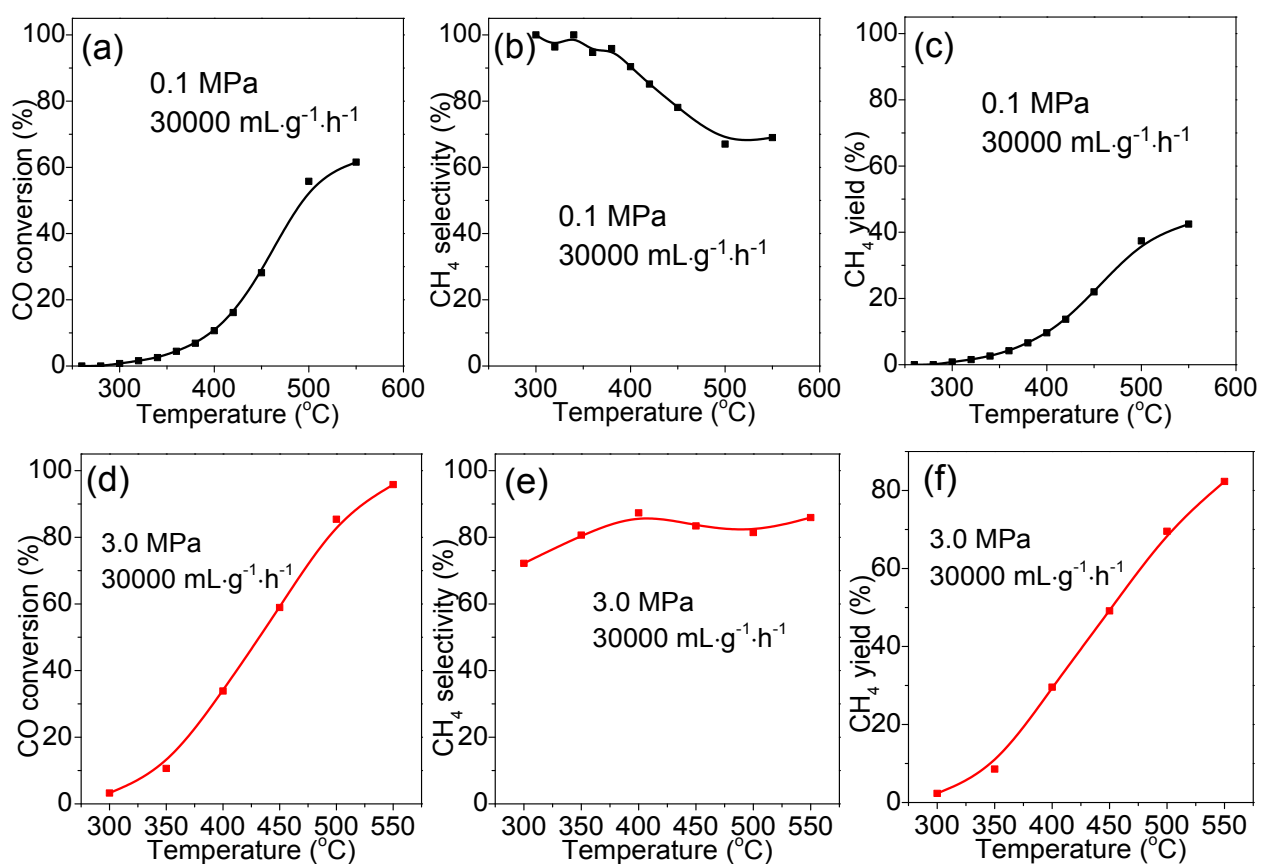

**Fig. S4** Catalytic properties of the Ni/AH-C: (a) (d) CO conversion, (b) (e) CH<sub>4</sub> selectivity, and (c) (f) CH<sub>4</sub> yield.
